# Supplementary material for: Efficacy of simultaneous VEGF‐A/ANG‐2 neutralization in suppressing spontaneous choroidal neovascularization
Source: PubMed Central journal article supplement (PMC6505683; doi:10.15252/emmm.201810204), 2019-04-30

## **Appendix Table of Contents**

- 1) Appendix Figure Legends S1 – S3**
- 2) Appendix Figures S1-S3**

## 1) Appendix Figure Legends S1 – S3

### **Appendix Figure Legend S1. Dual neutralization of VEGF-A and ANG-2 in JR5558 mice reduced the number of TUNEL-positive apoptotic nuclei in the photoreceptor layer.**

A Bar/scatter graph of the number of TUNEL-positive cells in the retina of mice treated with 10 mg/kg IgG control, 5 mg/kg anti-VEGF-A, 5 mg/kg anti-ANG-2, 10 mg/kg anti-VEGF-A/ANG-2 or left untreated. Data shown as mean  $\pm$  SEM with n = 10 animals per group and \* denotes all significant changes after one-sided ANOVA and Tukey's multiple t-test (Tukey-Kramer HSD). Anti-VEGF-A/ANG-2 (\*\*, P = 0.007) and Anti-ANG-2 (\*, P = 0.011) are significantly different from IgG control.

B Annotated images of representative examples of retina TUNEL staining of untreated (top left), IgG control (top middle; 10 mg/kg), anti-VEGF-A (bottom left; 5 mg/kg), anti-ANG-2 (bottom middle; 5 mg/kg), and anti-VEGF-A/ANG-2 (bottom right; 10 mg/kg). For better visualization images were converted to black/white modus using PhotoShop CS6 with contrast enhancement applied equally to all images and non-tissue background was removed using Lasso tool. Scale bars = 500  $\mu$ m. SEM, standard error of the mean; ANOVA, analysis of variance.

### **Appendix Figure Legend S2. Coordinates of Iba1-Positive Cells on RPE/Choroid Flat Mounts**

XY-coordinates of identified Iba1-positive cells per RPE/choroid were exported to GraphPad Prism and displayed as scatter plots to visualize distribution and clumping.

### **Appendix Figure Legend S3. Thumbnail images of annotated retinal flat mounts (TUNEL) and coordinates.**

XY-coordinates of TUNEL-positive cells per retina were exported to GraphPad Prism and displayed as scatter plots to visualize distribution.

A)

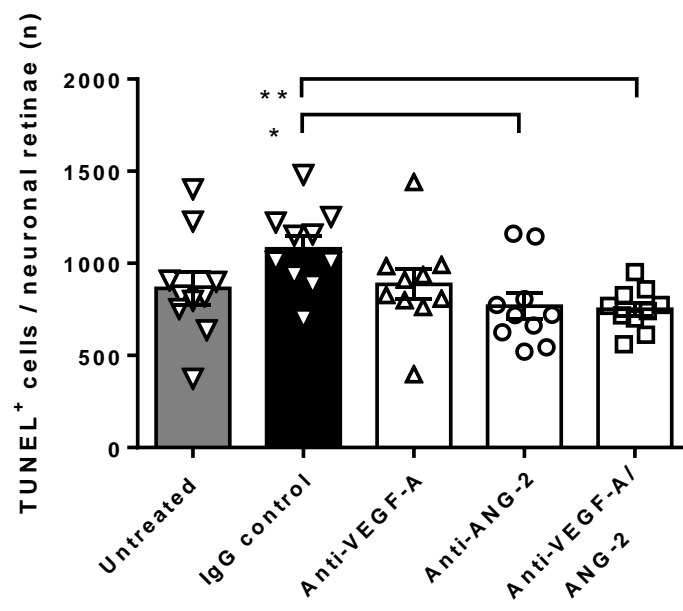

B)

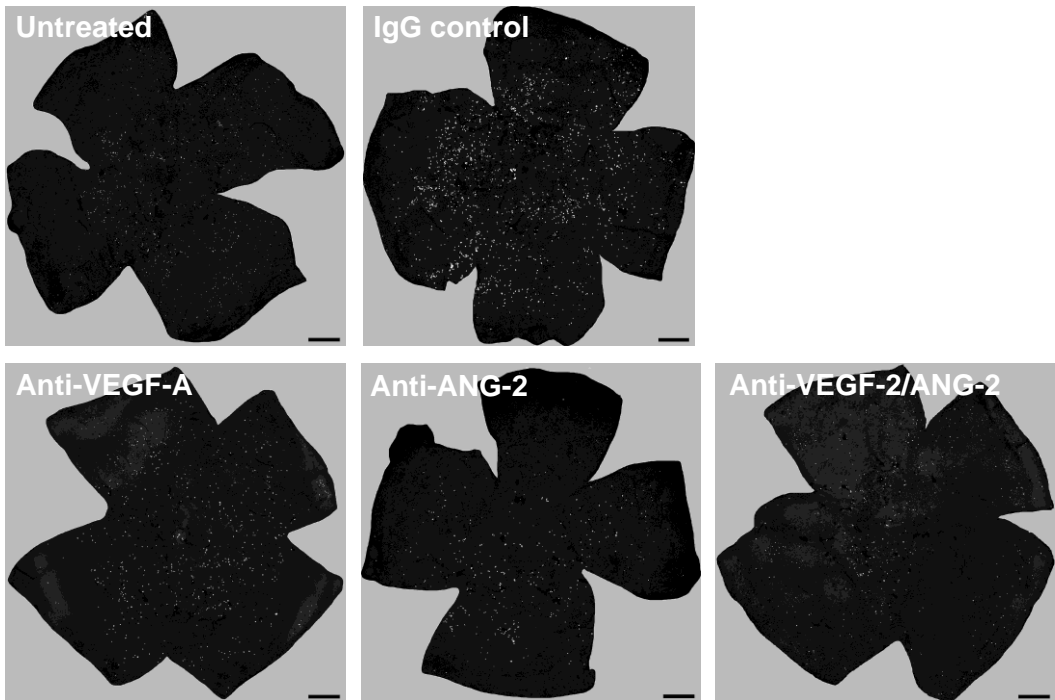

# APPENDIX FIGURE S2 - COORDINATES OF IBA1-POSITIVE CELLS ON RPE/CHOROID FLAT MOUNTS

## A) Group: Untreated

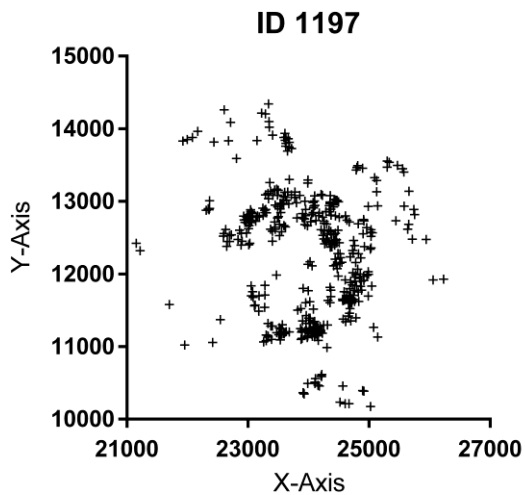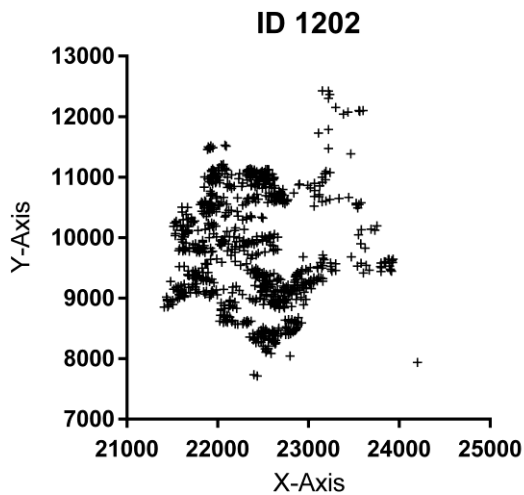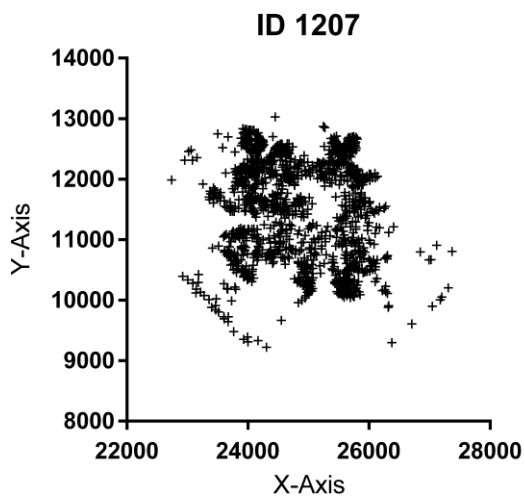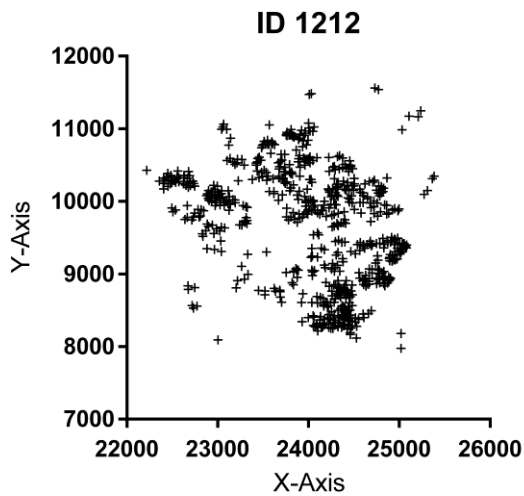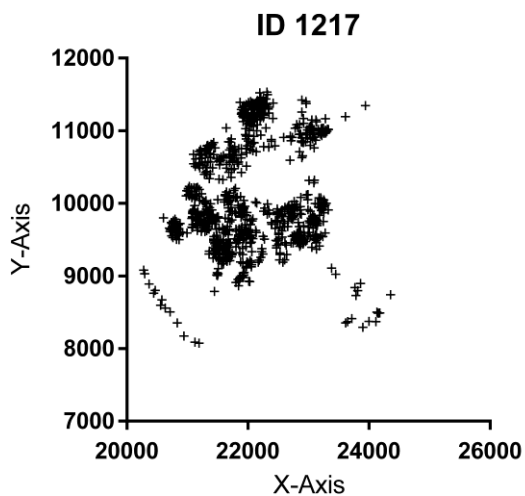

**APPENDIX FIGURE S2 - COORDINATES OF IBA1-POSITIVE CELLS ON RPE/CHOROID FLAT MOUNTS**

**B) Group: IgG control**

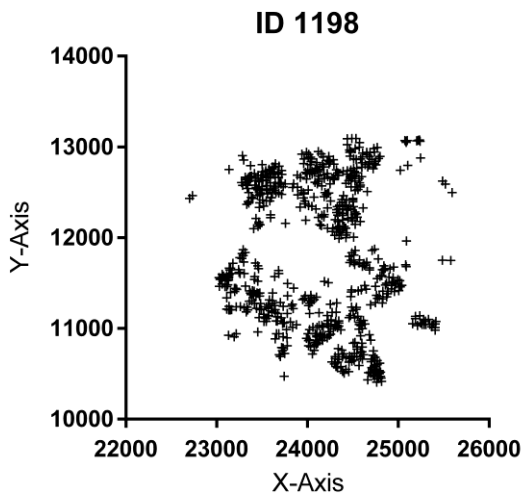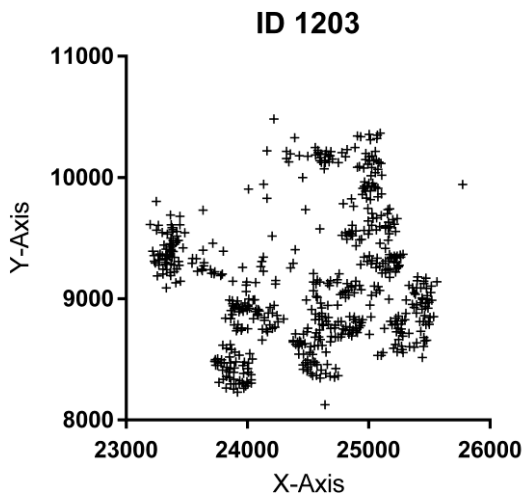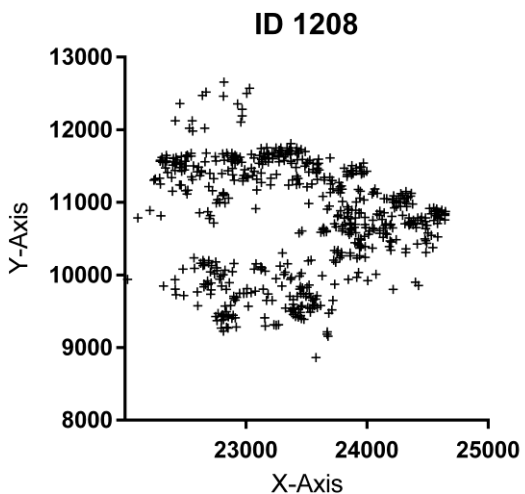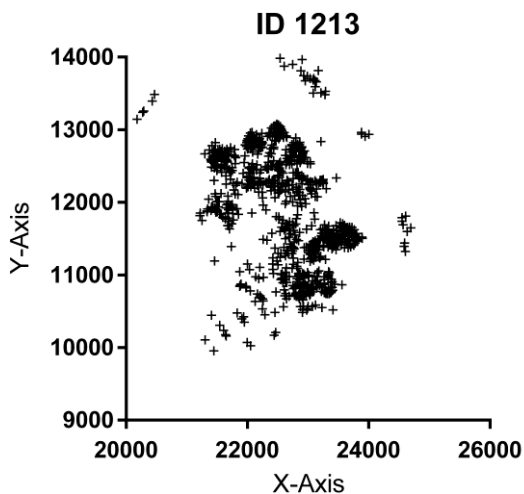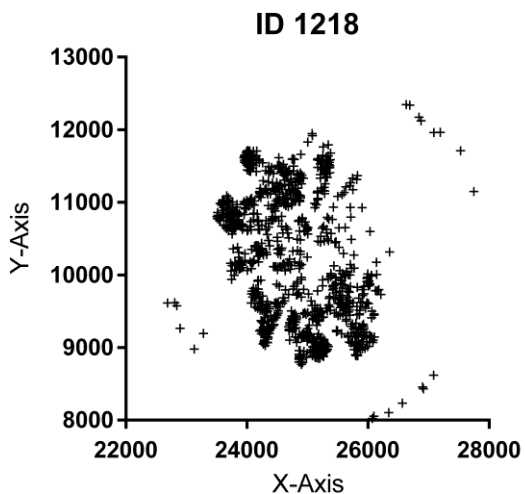

**APPENDIX FIGURE S2 - COORDINATES OF IBA1-POSITIVE CELLS ON RPE/CHOROID FLAT MOUNTS**

**C) Group: Anti-VEGF-A**

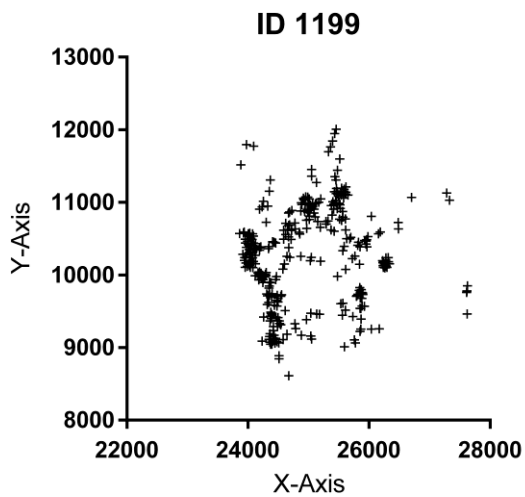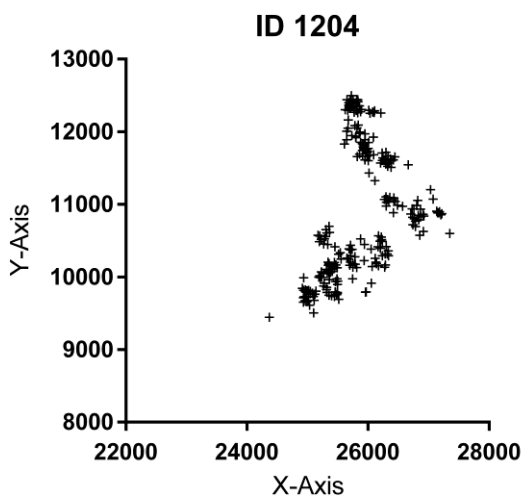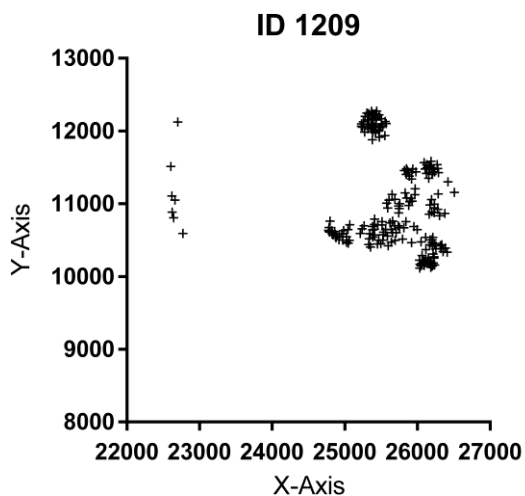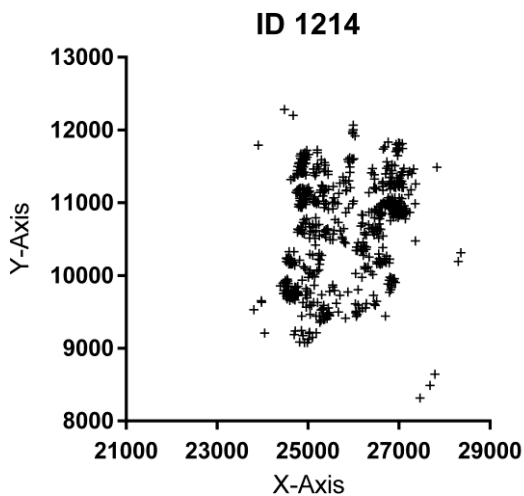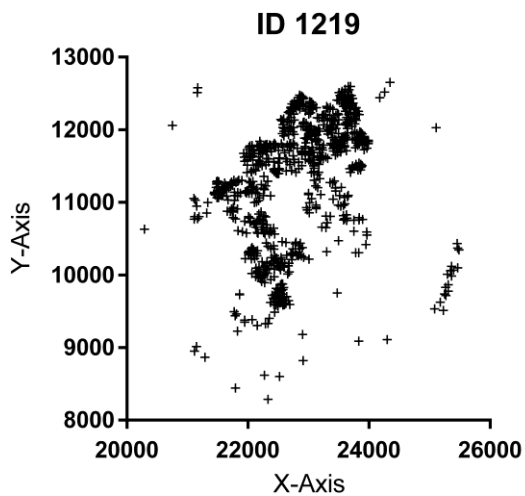

**APPENDIX FIGURE S2 - COORDINATES OF IBA1-POSITIVE CELLS ON RPE/CHOROID FLAT MOUNTS**

**D) Group: Anti-ANG-2**

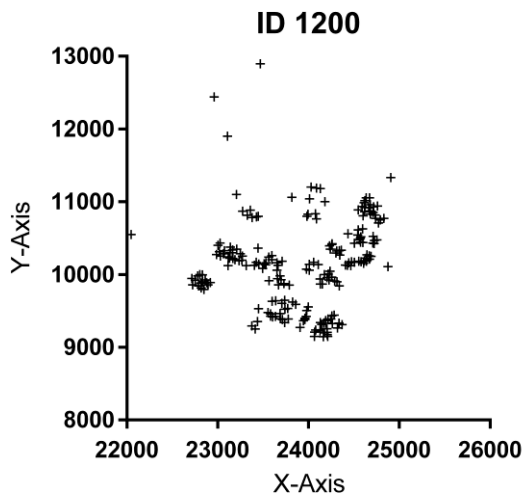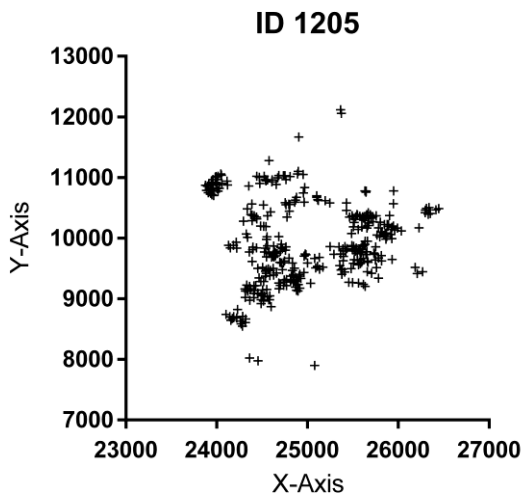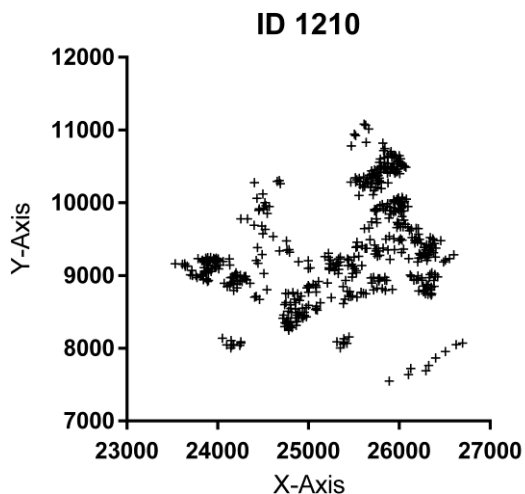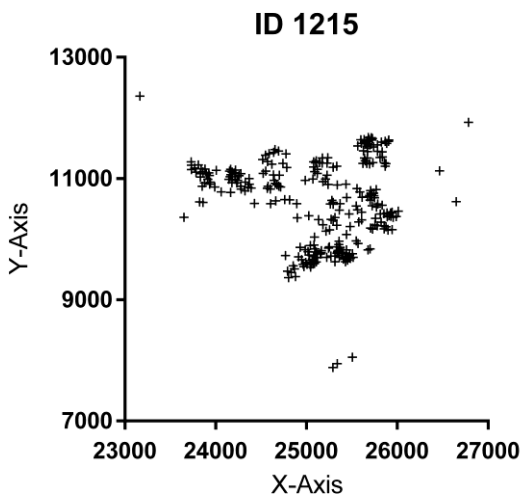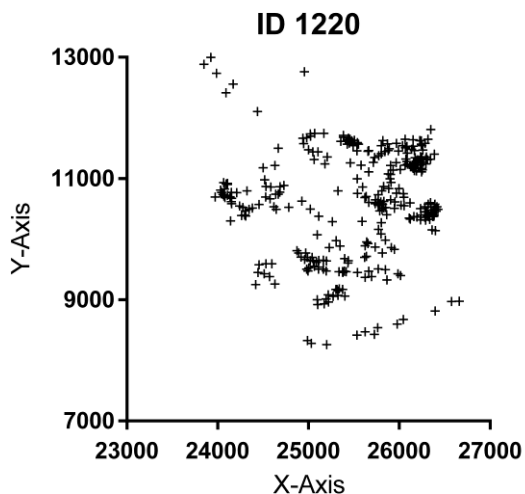

**APPENDIX FIGURE S2 - COORDINATES OF IBA1-POSITIVE CELLS ON RPE/CHOROID FLAT MOUNTS**

**E) Group: anti-VEGF-A/ANG-2**

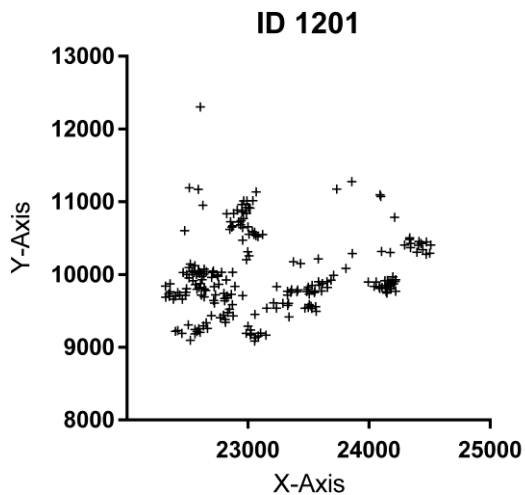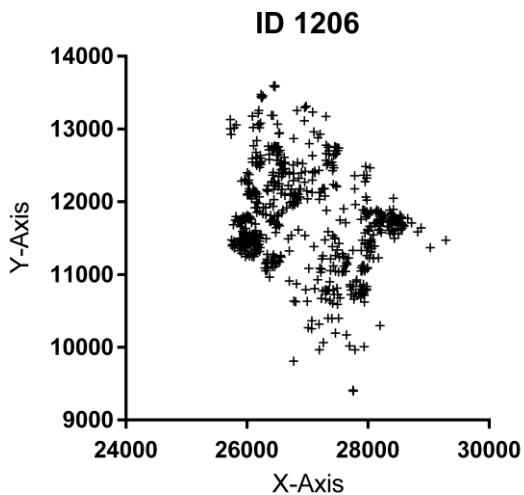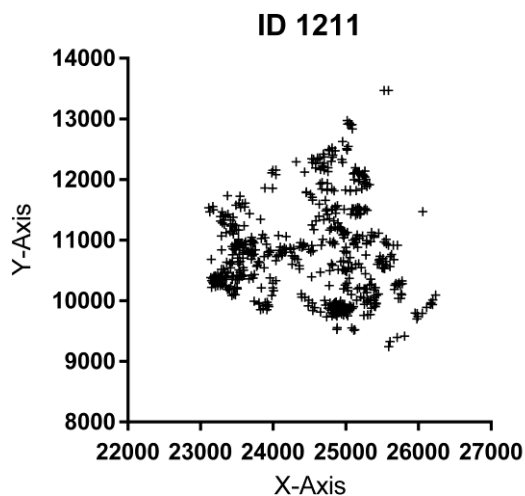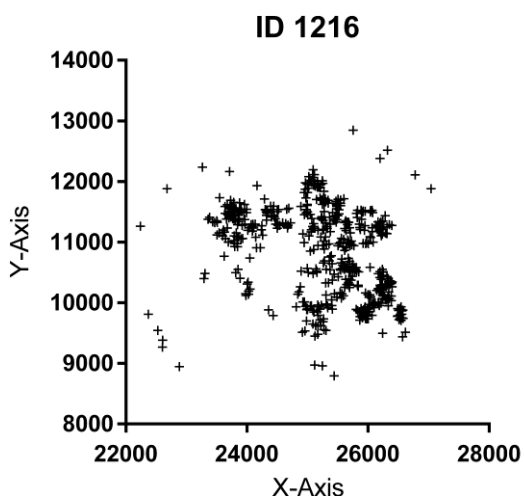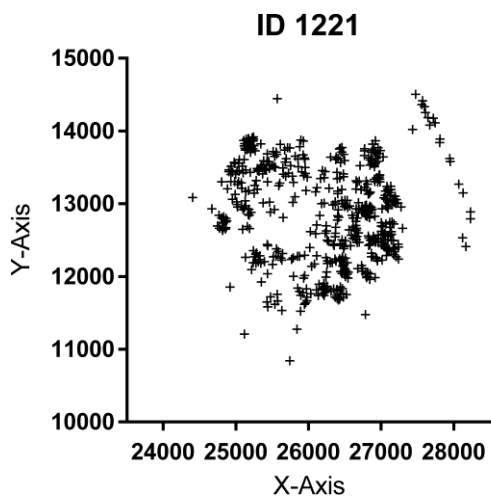



# APPENDIX FIGURE S3 - THUMBNAIL IMAGES OF ANNOTATED RETINAL FLAT MOUNTS (TUNEL) AND COORDINATES

## A) Group: Untreated

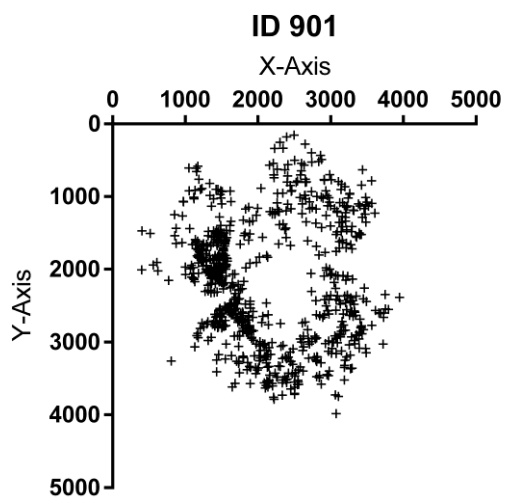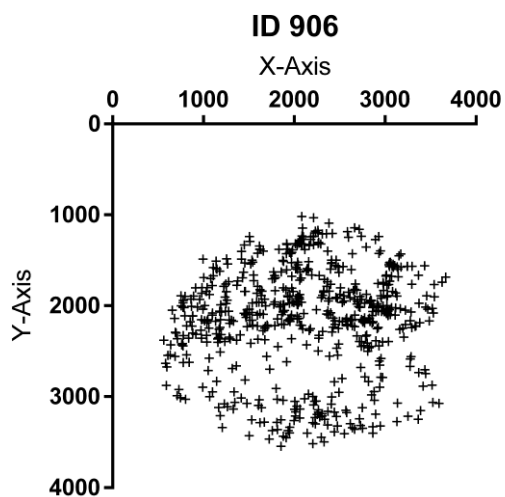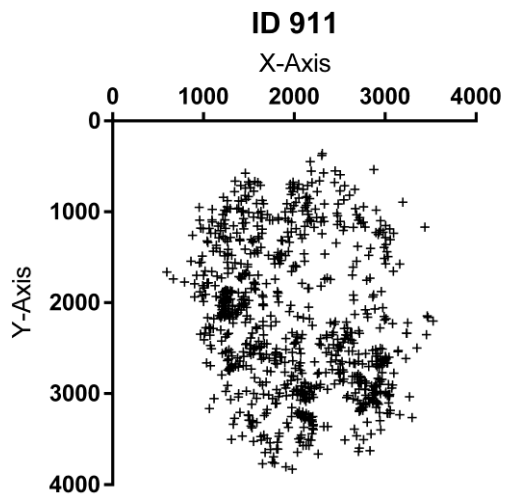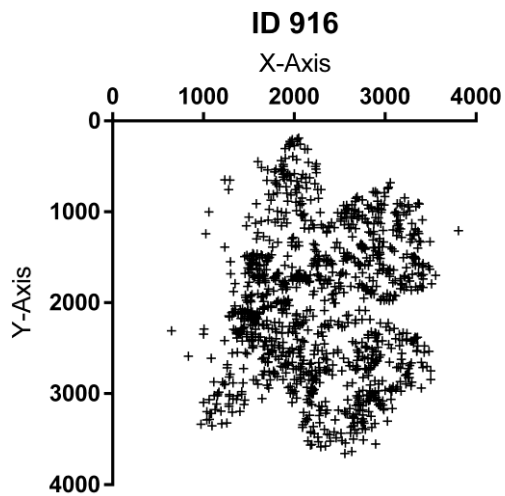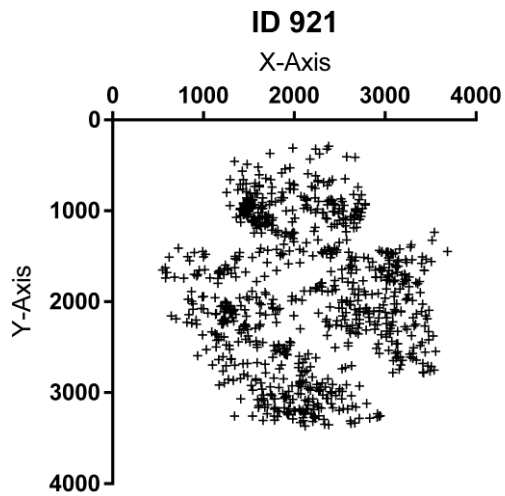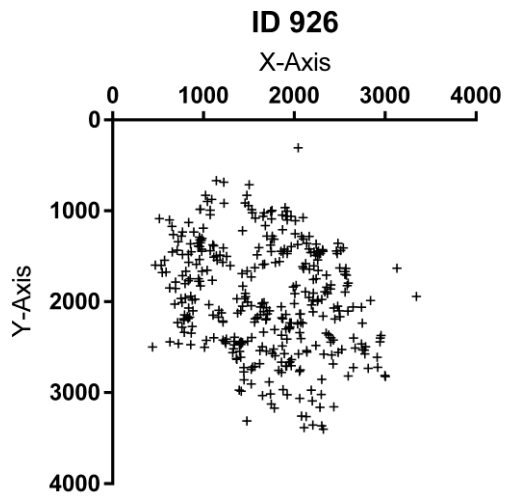

**APPENDIX FIGURE S3 - THUMBNAIL IMAGES OF ANNOTATED  
RETINAL FLAT MOUNTS (TUNEL) AND COORDINATES**

**A) Group: Untreated**

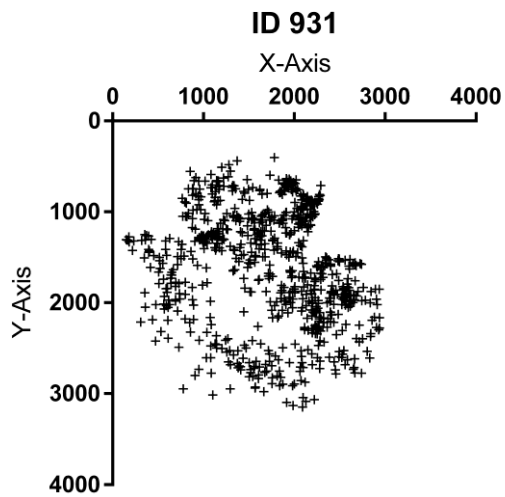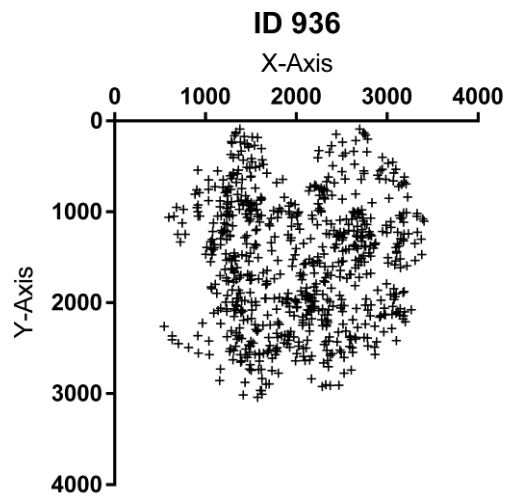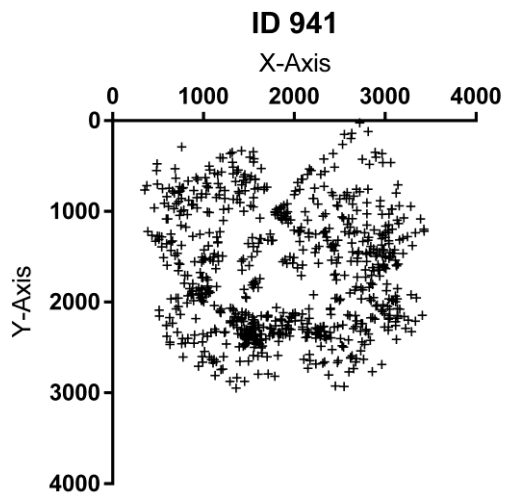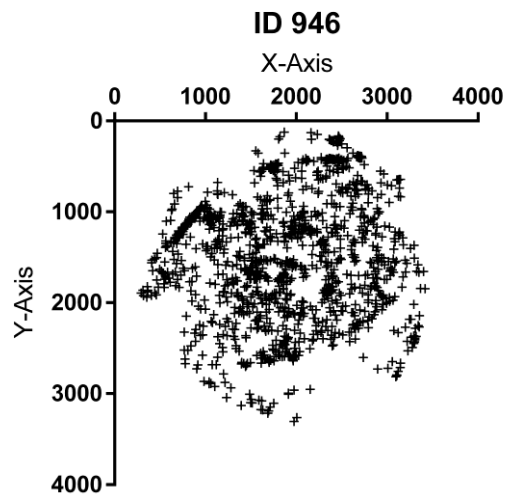

**APPENDIX FIGURE S3 - THUMBNAIL IMAGES OF ANNOTATED  
RETINAL FLAT MOUNTS (TUNEL) AND COORDINATES**

**B) Group: IgG control**

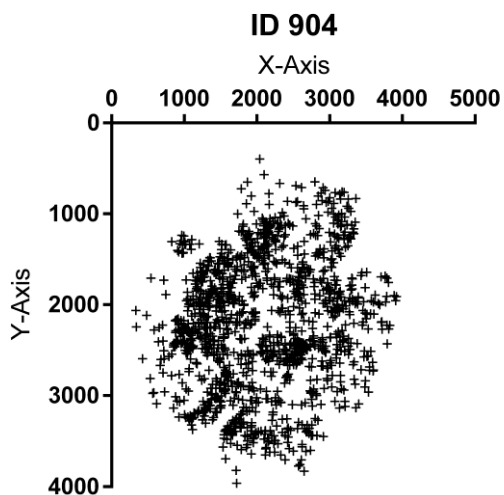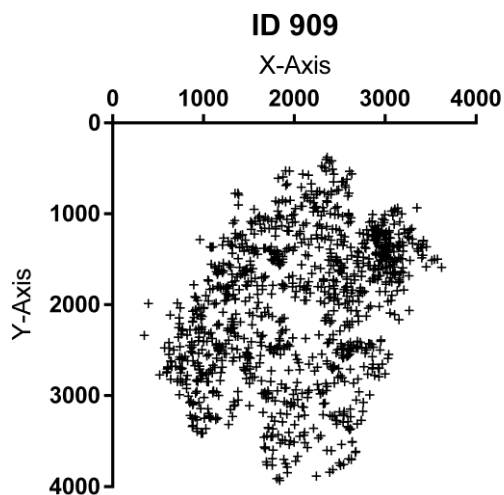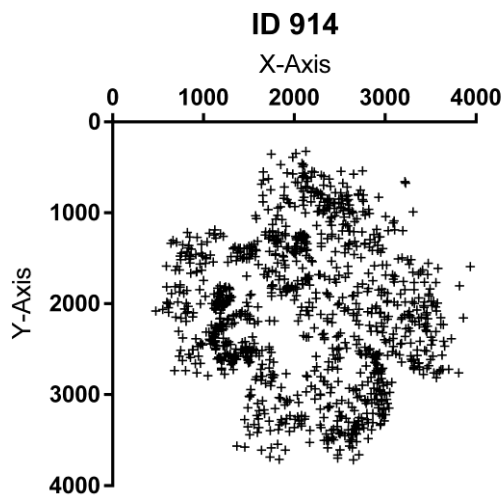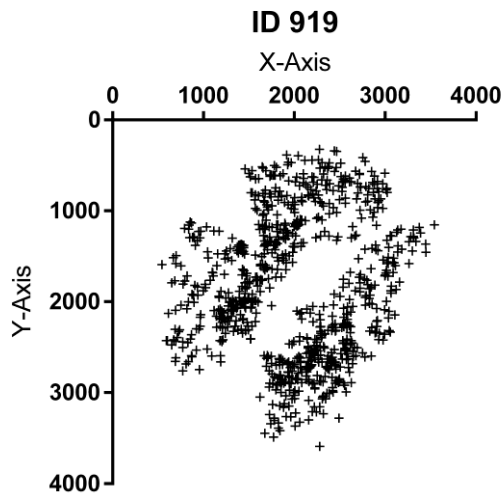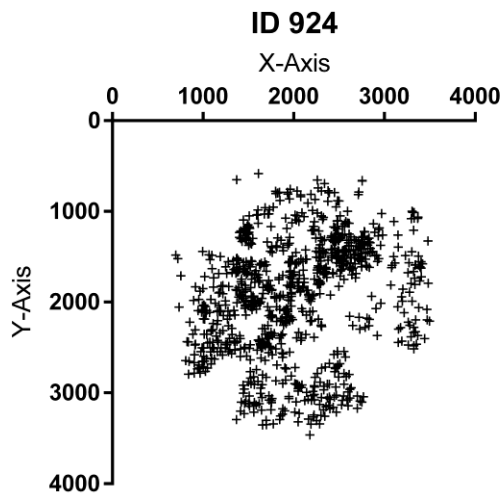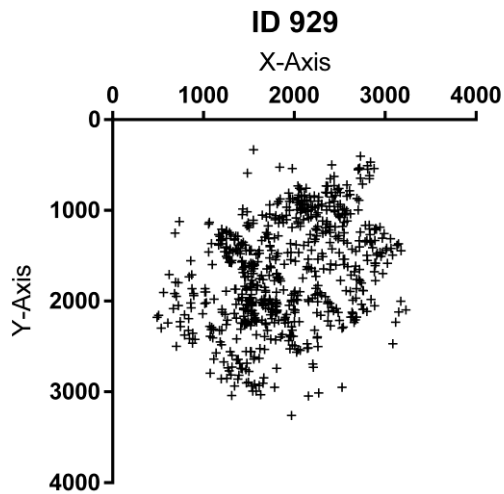

**APPENDIX FIGURE S3 - THUMBNAIL IMAGES OF ANNOTATED  
RETINAL FLAT MOUNTS (TUNEL) AND COORDINATES**

**B) Group: IgG control**

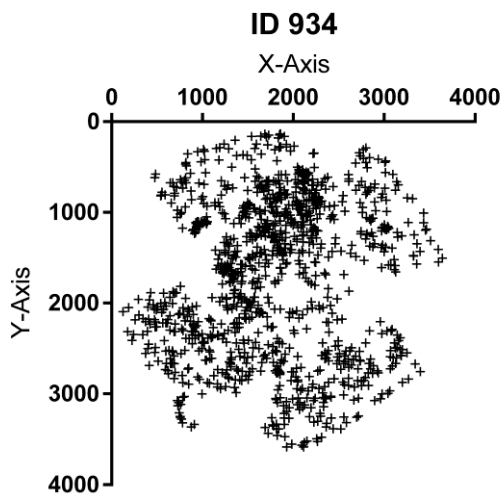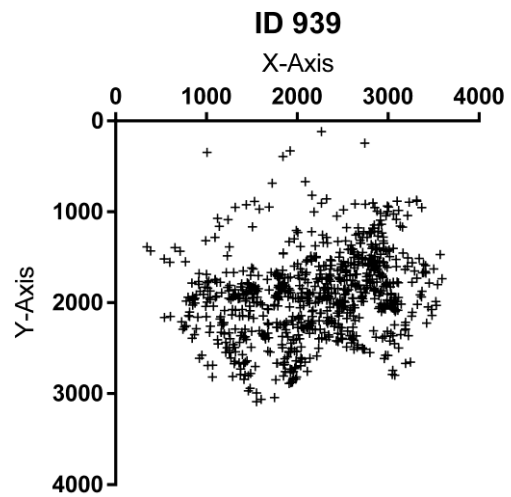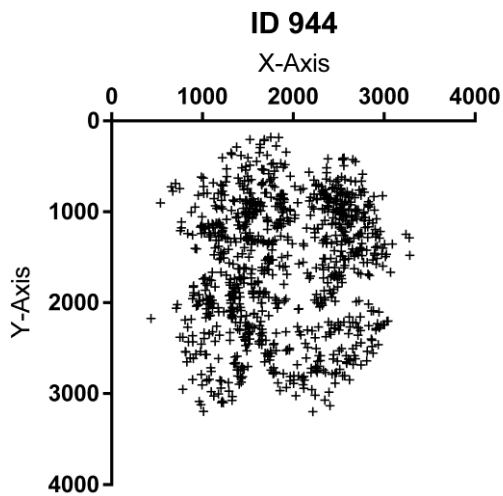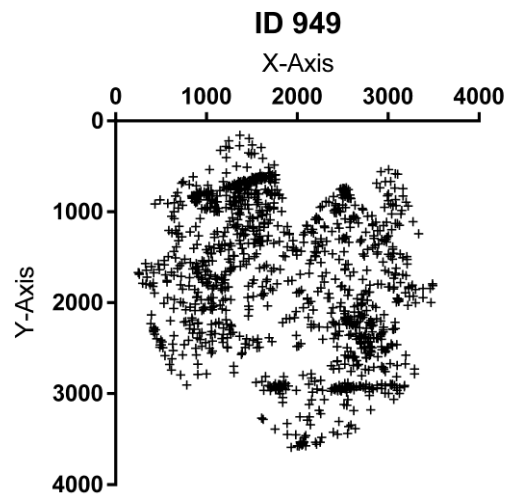

**APPENDIX FIGURE S3 - THUMBNAIL IMAGES OF ANNOTATED  
RETINAL FLAT MOUNTS (TUNEL) AND COORDINATES**

**C) Group: Anti-VEGF-A**

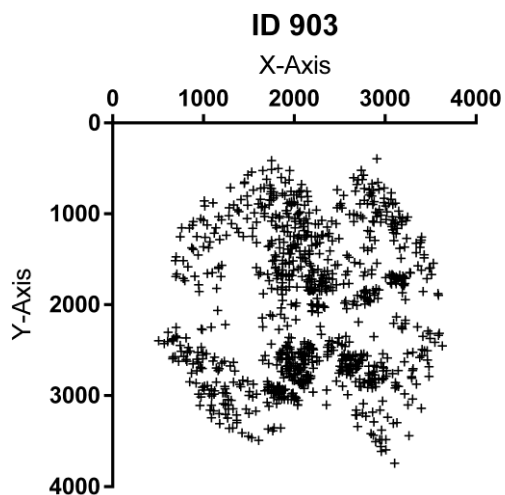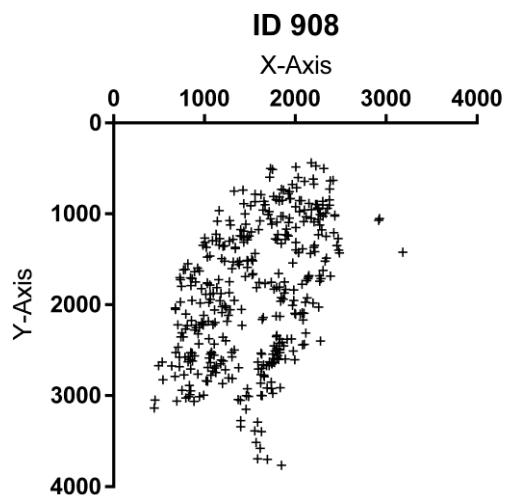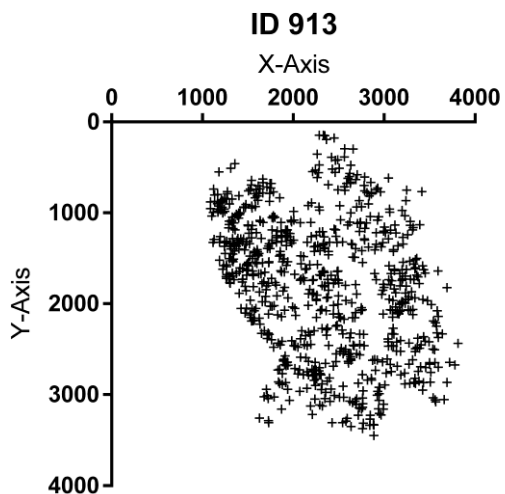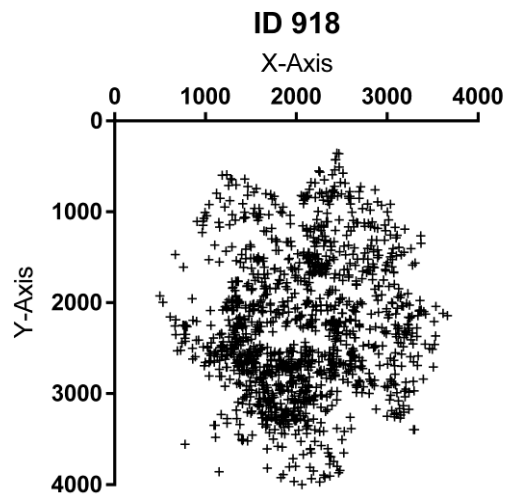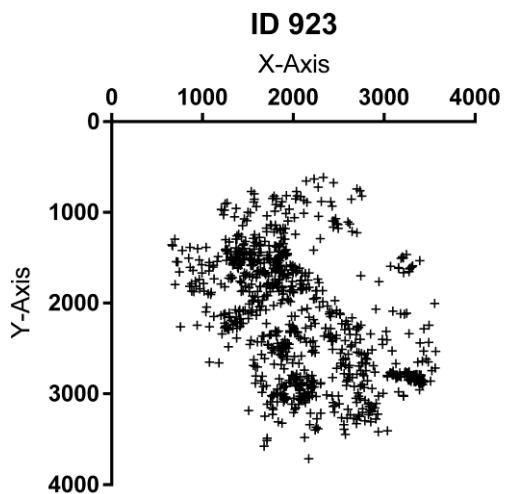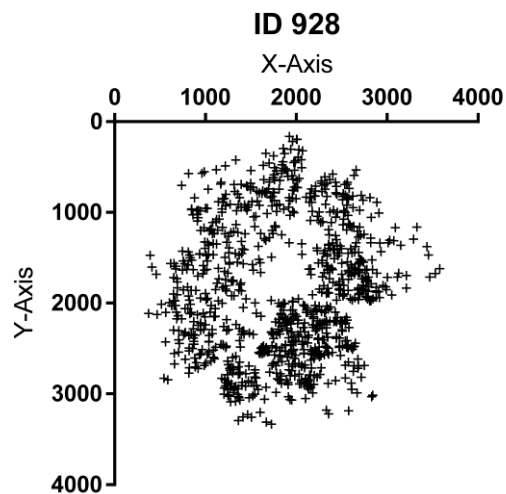

**APPENDIX FIGURE S3 - THUMBNAIL IMAGES OF ANNOTATED  
RETINAL FLAT MOUNTS (TUNEL) AND COORDINATES**

**C) Group: Anti-VEGF-A**

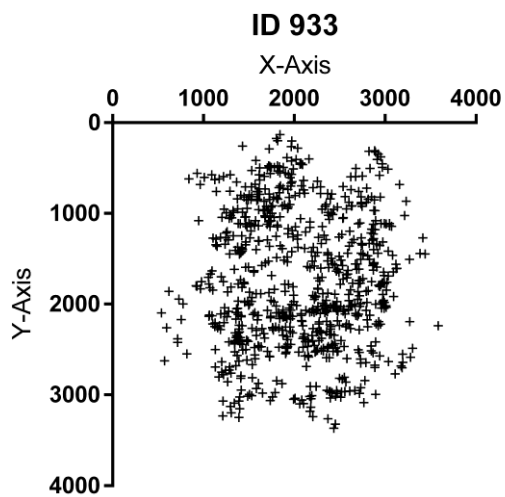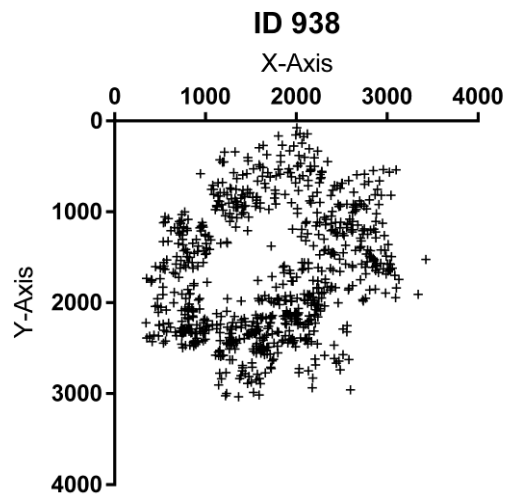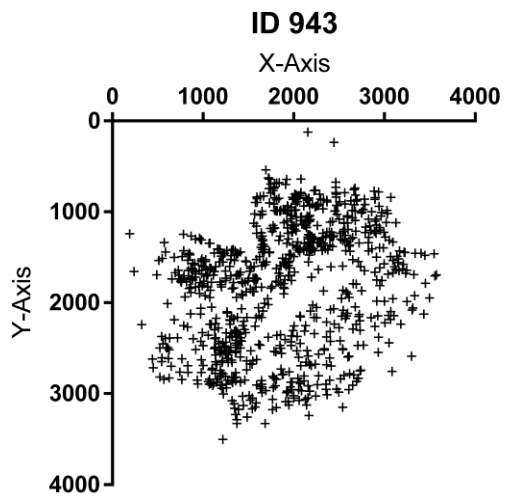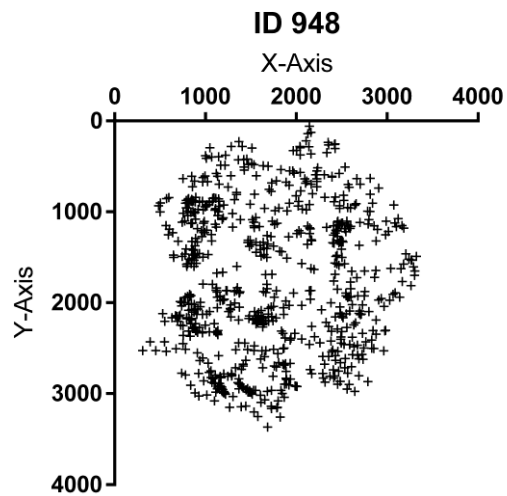

**APPENDIX FIGURE S3 - THUMBNAIL IMAGES OF ANNOTATED  
RETINAL FLAT MOUNTS (TUNEL) AND COORDINATES**

**D) Group: Anti-ANG-2**

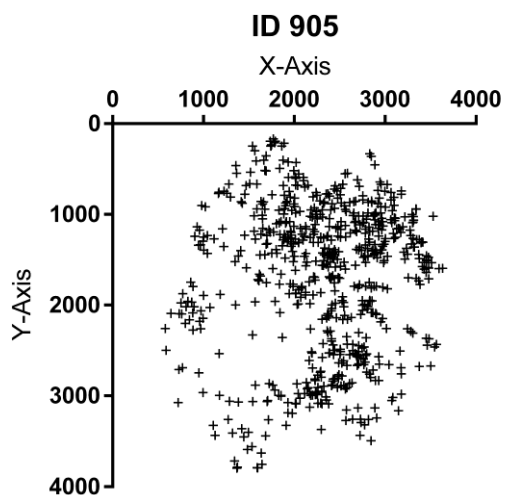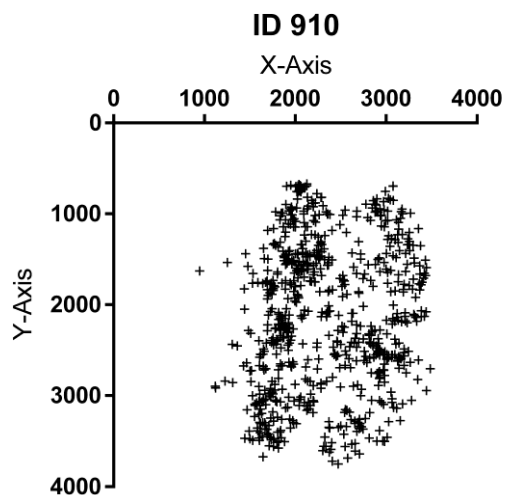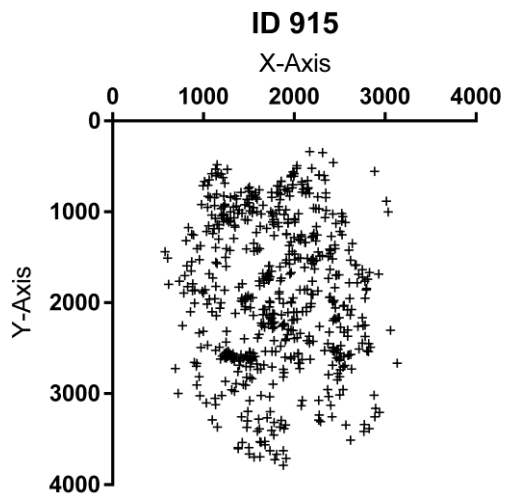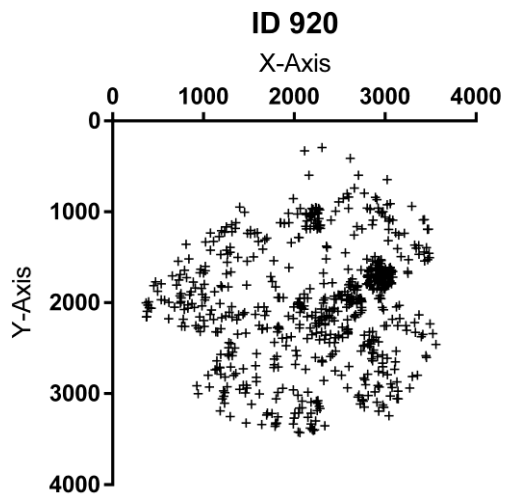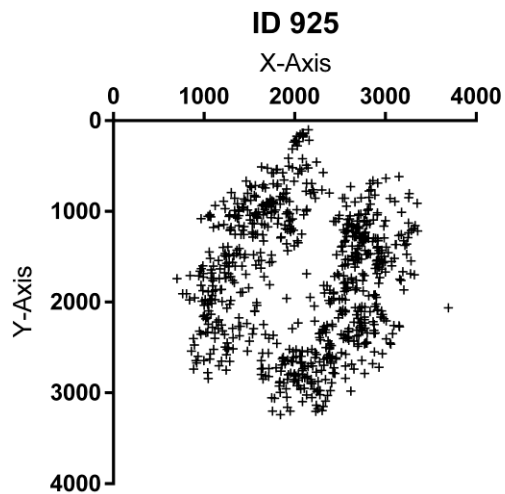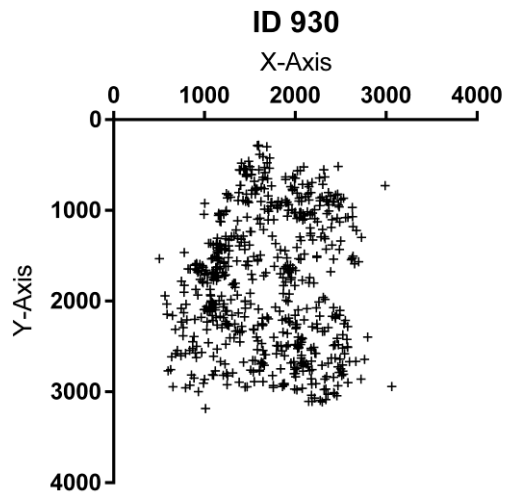

**APPENDIX FIGURE S3 - THUMBNAIL IMAGES OF ANNOTATED  
RETINAL FLAT MOUNTS (TUNEL) AND COORDINATES**

**D) Group: Anti-ANG-2**

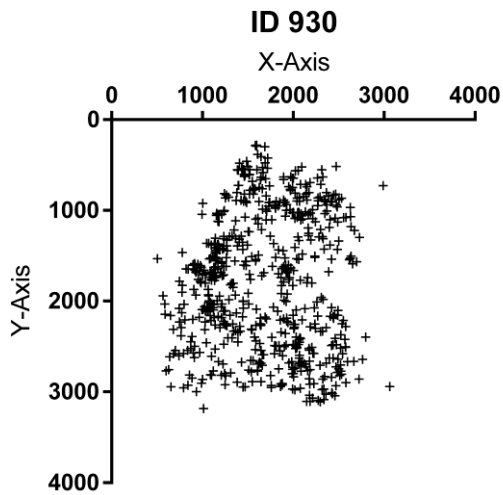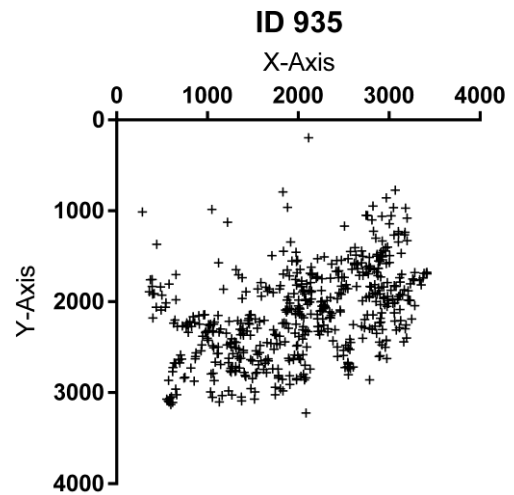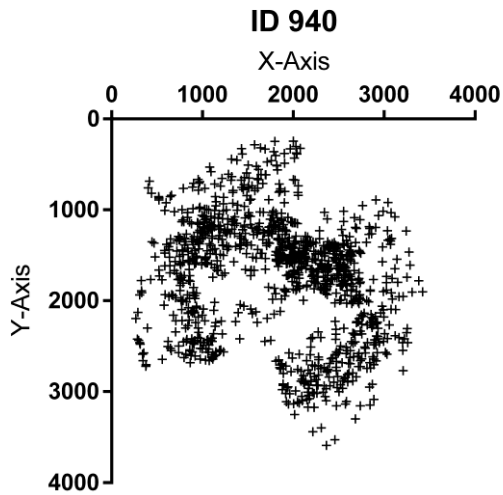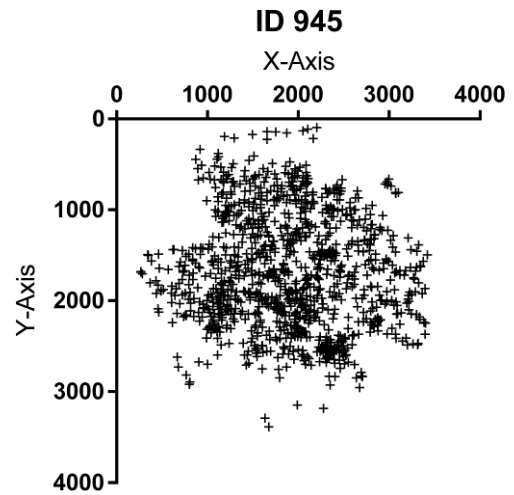



**APPENDIX FIGURE S3 - THUMBNAIL IMAGES OF ANNOTATED  
RETINAL FLAT MOUNTS (TUNEL) AND COORDINATES**

**E) Group: anti-VEGF-A/ANG-2**

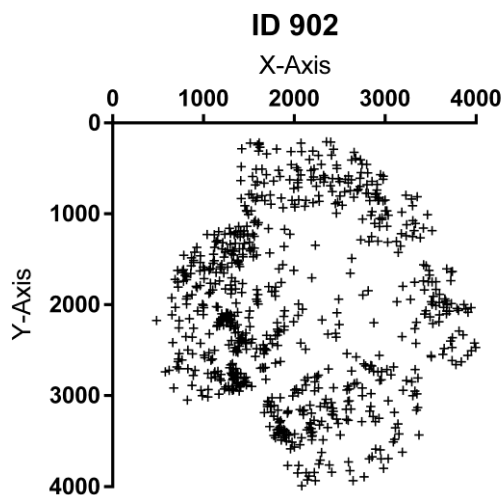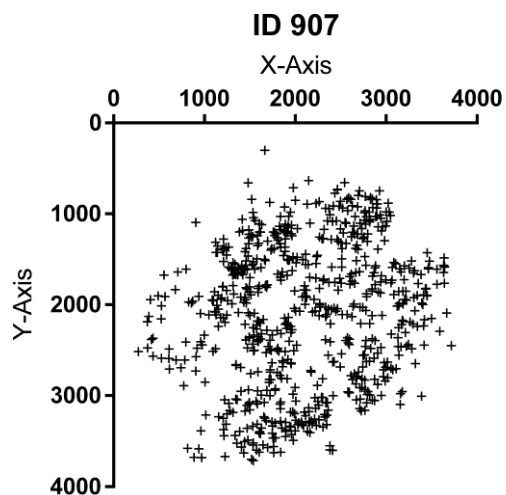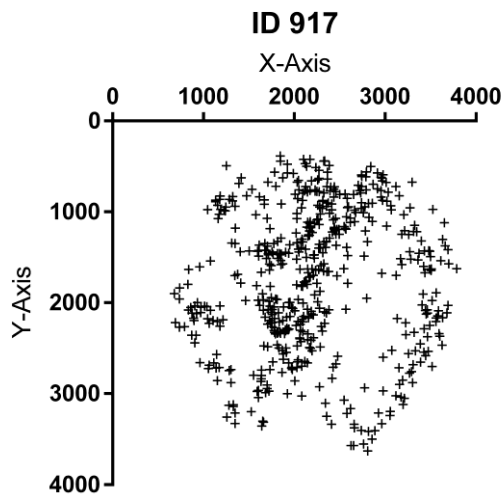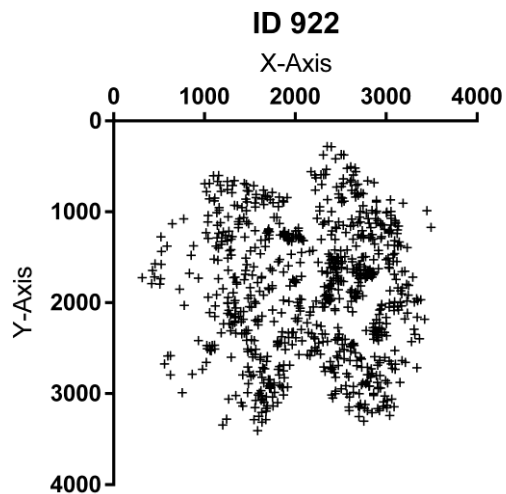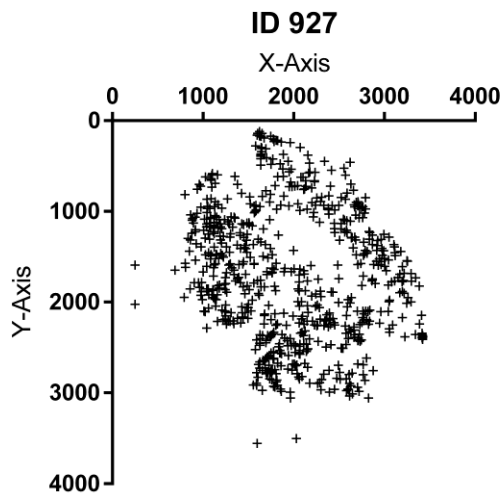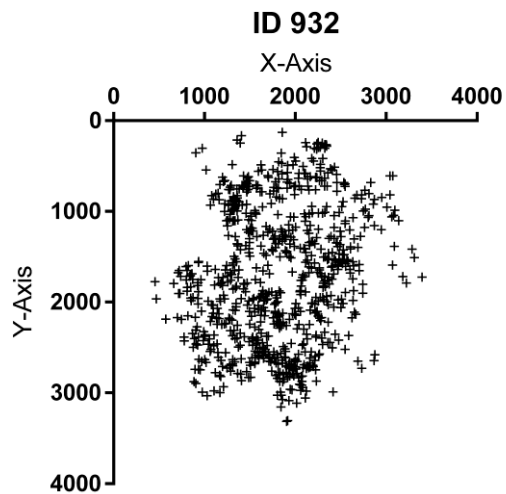

**APPENDIX FIGURE S3 - THUMBNAIL IMAGES OF ANNOTATED  
RETINAL FLAT MOUNTS (TUNEL) AND COORDINATES**

**E) Group: anti-VEGF-A/ANG-2**

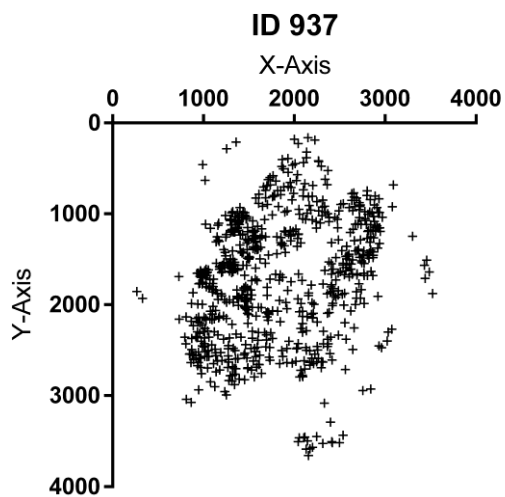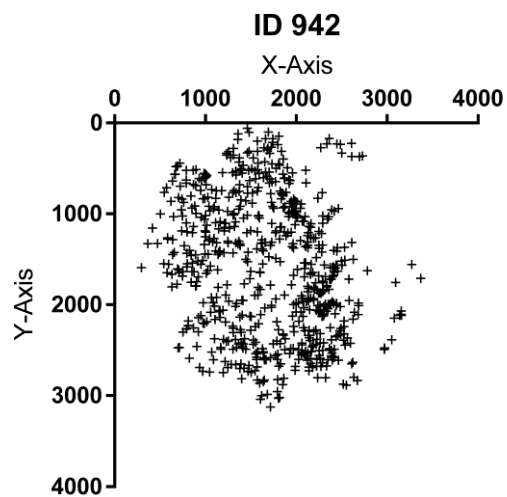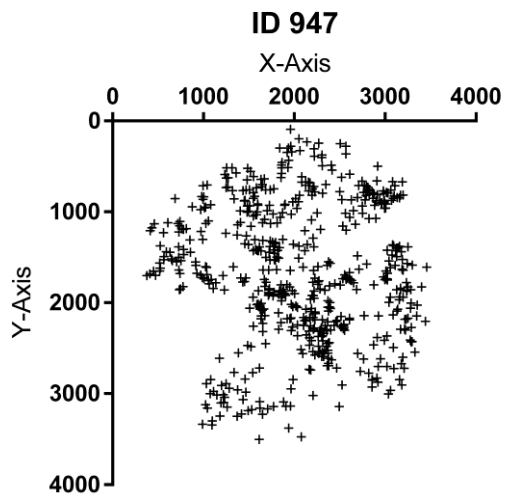

Supplement: EMMM-11-e10204-s001.pdf [file EMMM-11-e10204-s001.pdf]
